# Supplementary material for: Immune Defense Mechanism of Reticulitermes chinensis Snyder (Blattodea: Isoptera) against Serratia marcescens Bizio
Source: MDPI journal article supplement (doi:10.3390/insects13030226), 2022-02-24
Supplement: s1 [file s1]

**Table S2.** Summary of sequencing data analysis.

| Sample | Clean Reads Pairs | Clean base(bp) | Length  | Q20(%)    | Q30(%)    | GC (%)    |
|--------|-------------------|----------------|---------|-----------|-----------|-----------|
| RC1    | 33,572,113        | 10,071,633,900 | 150;150 | 98.0;97.2 | 94.1;92.2 | 42.0;42.0 |
| RC2    | 32,061,292        | 9,618,387,600  | 150;150 | 98.0;97.1 | 94.1;91.8 | 41.9;41.8 |
| RC3    | 30,728,402        | 9,218,520,600  | 150;150 | 97.9;97.2 | 93.9;92.2 | 41.8;41.8 |
| SM-RC1 | 30,947,431        | 9,284,229,300  | 150;150 | 98.0;97.0 | 94.2;91.9 | 42.6;42.6 |
| SM-RC2 | 30,655,201        | 9,196,560,300  | 150;150 | 97.9;97.2 | 94.0;92.4 | 42.8;42.8 |
| SM-RC3 | 28,939,264        | 8,681,779,200  | 150;150 | 97.9;96.7 | 94.1;91.2 | 43.1;43.1 |

RC1, RC2 and RC3: healthy *R. chinensis* (CK); SM-RC1, SM-RC2 and SM-RC3: *R. chinensis* infected with SM1 (SM-HC); clean read pairs: the data were used for bioinformatic analysis.  
Q20, Q30: the percentage of bases with a Phred value >20, 30.

**Table S3.** Annotation of Nr transcripts against public databases.

| Database          | Number of Transcripts (Percentage) |
|-------------------|------------------------------------|
| Total Transcripts | 394,290 (100%)                     |
| KOG               | 68,985 (17.50%)                    |
| KEGG              | 78,454 (19.90%)                    |
| NR                | 118,572 (30.07%)                   |
| GO                | 60,043 (15.23%)                    |
| Swiss-Prot        | 101,639 (25.78%)                   |
| Unknown           | 268,243 (68.03%)                   |
